# Supplementary material for: AcrAB−TolC, a major efflux pump in Gram negative bacteria: toward understanding its operation mechanism
Source: PubMed Central journal article supplement — BMB Rep. 2023 Jun 7;56(6):326–34. doi: 10.5483/BMBRep.2023-0070 (PMC10315565; doi:10.5483/bmbrep.2023-0070), 2023-06-07
Supplement: bmb-56-6-326-supple.pdf [file bmb-56-6-326-supple.pdf]

Supplementary Data

## **AcrAB–TolC, a major efflux pump in Gram negative bacteria: toward understanding its operation mechanism**

Soojin Jang\*

Department of Discovery Biology, Antibacterial Resistance Laboratory, Institut Pasteur Korea, Seongnam 13488, Korea

\*Corresponding author. Tel: +82-31-8018-8194; Fax: +82-31-8018-8014;  
E-mail: soojin.jang@ip-korea.org

Supplementary Table 1. Chemical structures and physicochemical properties of AcrAB-TolC substrates and inhibitors

| Structure                                                                           | Compound              | Class                               | M. W. (g/mol) | HLB    | logP   | Topological polar surface area (Å <sup>2</sup> ) | Minimum projection area (Å <sup>2</sup> ) | Maximum projection area (Å <sup>2</sup> ) |
|-------------------------------------------------------------------------------------|-----------------------|-------------------------------------|---------------|--------|--------|--------------------------------------------------|-------------------------------------------|-------------------------------------------|
| 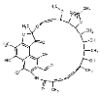   | 3-formyl-rifamycin    | Ansamycin                           | 725.788       | 17.243 | 5.187  | 218.38                                           | 91.81                                     | 159.13                                    |
|    | Acriflavine_1         | Planar aromatic antiseptic & dye    | 244.7         | 5.614  | 1.848  | 64.93                                            | 25.75                                     | 74.57                                     |
|    | Acriflavine_2         | Planar aromatic antiseptic & dye    | 224.286       | 2.885  | -2.808 | 55.92                                            | 28.91                                     | 79.98                                     |
|    | Amikacin              | Aminoglycoside                      | 585.608       | 46.272 | -8.584 | 331.94                                           | 76.66                                     | 141.69                                    |
|    | Azitromycin           | Macrolide                           | 748.996       | 21.354 | 2.183  | 180.08                                           | 116.17                                    | 169.25                                    |
|    | Azteronom             | Anionic-beta lactam                 | 435.43        | 22.599 | -3.078 | 201.58                                           | 60.09                                     | 100.55                                    |
|   | Benzalkonium chloride | Planar aromatic cationic surfactant | 227.78        | 11.395 | -0.924 | 0                                                | 42.87                                     | 66.88                                     |
|  | Berberine             | Planar aromatic quaternary ammonium | 336.366       | 5.625  | -1.283 | 40.8                                             | 43.16                                     | 101.85                                    |
|  | Biapenem              | Carbapenam                          | 351.4         | 16.865 | -6.063 | 99.54                                            | 48.98                                     | 95.61                                     |
|  | Carbenicillin         | Anionic-beta lactam                 | 378.4         | 21.237 | 0.815  | 124.01                                           | 53.72                                     | 88.98                                     |
|  | Cefamandole           | Beta lactam                         | 462.5         | 23.013 | 0.027  | 150.54                                           | 56.82                                     | 95.06                                     |
|  | Ceftazidime           | Beta lactam                         | 547.58        | 25.735 | -4.122 | 188.39                                           | 68.29                                     | 119.73                                    |
|  | Cefuroxime            | Beta lactam                         | 424.38        | 24.146 | -0.903 | 173.76                                           | 60.77                                     | 95.84                                     |
|  | Chloramphenicol       | Phenicol                            | 323.13        | 18.319 | 0.879  | 112.7                                            | 39.36                                     | 77.63                                     |
|  | Ciprofloxacin         | Fluoroquinolone                     | 331.347       | 13.416 | -0.88  | 72.88                                            | 43.14                                     | 96.57                                     |
|  | Clarithromycin        | Macrolide                           | 747.964       | 15.496 | 3.24   | 182.91                                           | 106.52                                    | 161.87                                    |

|                                                                                     |                              |                                     |         |        |        |        |        |        |
|-------------------------------------------------------------------------------------|------------------------------|-------------------------------------|---------|--------|--------|--------|--------|--------|
|    | Clindamycin                  | Lincomycin                          | 424.98  | 21.345 | 1.038  | 102.26 | 72.48  | 103.94 |
|    | Cloxacillin                  | Beta lactam                         | 435.88  | 19.139 | 2.302  | 112.74 | 68.26  | 88.31  |
|    | Crystal violet               | Planar aromatic dye                 | 407.99  | 2.89   | 1.396  | 9.49   | 69.24  | 115.51 |
|    | Dequalinium                  | Planar aromatic quaternary ammonium | 456.677 | 1      | -3.591 | 59.8   | 66.41  | 156.6  |
|    | Dicloxacillin                | Beta lactam                         | 470.32  | 18.968 | 2.906  | 112.74 | 67.56  | 89.07  |
|    | Dodecyl $\beta$ -D-maltoside | Nonionic surfactant                 | 510.621 | 14.368 | 0.82   | 178.53 | 65.87  | 149.03 |
|   | Doripenem                    | Carbapenam                          | 420.5   | 27.832 | -5.564 | 162.06 | 55.18  | 108.39 |
|  | Doxorubicin                  | Anthracycline                       | 543.525 | 17.968 | 0.765  | 206.07 | 76.14  | 135.22 |
|  | Doxycycline                  | Tetracycline                        | 444.44  | 21.623 | -0.611 | 178.46 | 69.78  | 92.31  |
|  | Enoxacin                     | Fluoroquinolone                     | 320.324 | 14.439 | -1.028 | 85.77  | 42.61  | 94.61  |
|  | Ertapenem                    | Carbapenam                          | 475.52  | 27.445 | -3.21  | 156.27 | 73.49  | 117.16 |
|  | Erythromycin                 | Macrolide                           | 733.937 | 16.089 | 2.596  | 193.91 | 107.16 | 147.81 |
|  | Ethidium bromide             | Planar aromatic dye                 | 394.316 | 0.73   | -0.913 | 55.92  | 47.18  | 98.84  |
|  | Fusidic acid                 | protein synthesis inhibitor         | 516.719 | 4.566  | 4.422  | 104.06 | 76.47  | 136.59 |
|  | Gentamicin                   | Aminoglycoside                      | 477.603 | 39.747 | -3.137 | 199.73 | 73.63  | 117.98 |
|  | Hoechst 33342                | Planar aromatic dye                 | 452.562 | 10.274 | 4.75   | 73.07  | 56.31  | 127.76 |

|                                                                                     |                |                             |         |        |        |        |        |        |
|-------------------------------------------------------------------------------------|----------------|-----------------------------|---------|--------|--------|--------|--------|--------|
| 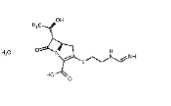   | Imipenem       | Carbapenam                  | 317.36  | 23.541 | -3.797 | 113.72 | 37.49  | 85.22  |
|    | Levofloxacin   | Fluoroquinolone             | 361.373 | 14.683 | -1.062 | 73.32  | 45.74  | 101.81 |
|    | Linezolid      | Oxazolidinone               | 337.351 | 15.039 | 0.637  | 71.11  | 47.21  | 88.82  |
|    | Meropenem      | Carbapenam                  | 383.46  | 27.418 | -4.354 | 110.18 | 55.31  | 99.51  |
|    | Minocycline    | Tetracycline                | 457.483 | 21.941 | -2.614 | 164.63 | 63.79  | 107.96 |
|    | Nalidixic acid | Antimicrobial naphthyridone | 232.239 | 8.67   | 0.873  | 70.5   | 34.3   | 74.9   |
|    | Norfloxacin    | Fluoroquinolone             | 319.336 | 13.939 | -0.988 | 72.88  | 42.78  | 94.8   |
|   | Novobiocin     | Aminocoumarin               | 612.632 | 17.74  | 3.409  | 196.1  | 61.67  | 168.77 |
|  | Oxacillin      | Beta lactam                 | 401.44  | 19.339 | 1.698  | 112.74 | 67.52  | 86.84  |
|  | Piperacillin   | Beta lactam                 | 517.56  | 30.769 | -0.258 | 156.43 | 86.7   | 114.71 |
|  | Puromycin      | Aminonucleoside             | 471.518 | 21.297 | -0.299 | 160.88 | 67.09  | 127.06 |
|  | Rhodamine 6G   | Planar aromatic dye         | 479.02  | 0.28   | 6.709  | 63.5   | 79.31  | 127.34 |
|  | Rifampicin     | Ansamycin                   | 822.9   | 28.744 | 2.833  | 220.15 | 121.44 | 167.71 |
|  | Spiramycin     | Macrolide                   | 843.065 | 21.867 | 2.496  | 195.38 | 109.86 | 196.22 |
|  | Sulbenicillin  | Anionic-beta lactam         | 414.45  | 21.709 | 0.38   | 141.08 | 55.67  | 91.63  |
|  | Tetracycline   | Tetracycline                | 444.44  | 23.048 | -3.499 | 181.62 | 62.4   | 96.76  |

|                                                                                     |                                                        |                                     |         |        |        |        |        |        |
|-------------------------------------------------------------------------------------|--------------------------------------------------------|-------------------------------------|---------|--------|--------|--------|--------|--------|
| 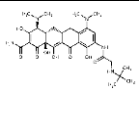   | Tigecycline                                            | Tetracycline                        | 585.658 | 31.848 | -3.86  | 205.76 | 78.97  | 140.1  |
|    | Tobramycin                                             | Aminoglycoside                      | 467.52  | 43.61  | -6.478 | 268.17 | 66.33  | 115.16 |
|    | Chlorpromazine                                         | Phenothiazine<br>antipsychotic, EPI | 318.86  | 10.268 | 4.535  | 6.48   | 54.73  | 79.81  |
|    | 2H-<br>benzo [h] chromene<br>WK2                       | EPI                                 | 400.478 | 3.76   | 5.073  | 57.38  | 53.96  | 123.92 |
|    | MBX2319                                                | EPI                                 | 668.53  | 7.652  | 4.401  | 34.59  | 70.64  | 116.94 |
|    | D13-9001                                               | EPI                                 | 694.79  | 22.67  | -1.005 | 207.99 | 112.98 | 169.88 |
|    | PABN<br>Phenylalanine-<br>Arginine-β-<br>Naphthylamide | EPI                                 | 519.47  | 26.164 | 1.726  | 146.12 | 62.89  | 126.78 |
|   | 1-(1-<br>naphthylmethyl)-<br>piperazine                | EPI                                 | 226.323 | 15.879 | 2.368  | 15.27  | 43.01  | 73.97  |
|  | BDM88855                                               | EPI                                 | 247.73  | 11.553 | 2.902  | 28.16  | 38     | 74.09  |

\* Physicochemical properties (molecular weight, hydrophilic-lipophilic Balance, logP, topological polar surface area, minimum projection area, maximum projection area obtained from the UCSF ChimeraX (93, 94)) of 57 molecules that have been tested as either substrates or inhibitors for AcrAB-TolC (57, 60, 62, 63, 66, 95-97).
